# Supplementary material
Source: MDPI journal article supplement (https://www.mdpi.com/2073-4441/15/16/2975)
Supplement: s1 [file s1]

## Supplementary information

Article

# Continuous Flow Photocatalytic Degradation of Phenol Using Palladium@Mesoporous TiO<sub>2</sub> Core@Shell Nanoparticles

Moses T. Yilleng<sup>1,2</sup>, Nancy Artioli<sup>1,3</sup>, David Rooney<sup>1</sup> and Haresh Manyar<sup>1,\*</sup>

<sup>1</sup> School of Chemistry and Chemical Engineering, Queen's University Belfast, David-Keir Building, Stranmillis Road, Belfast BT9 5AG, UK; yilleng@yahoo.com (M.T.Y.); nancy.artioli@unibs.it (N.A.); d.rooney@qub.ac.uk (D.R.)

<sup>2</sup> Department of Chemistry, Kaduna State University, Tafawa Balewa Way, Kaduna 800001, Kaduna State, Nigeria

<sup>3</sup> Department of Civil, Environmental, Architectural Engineering and Mathematics, University of Brescia, Via Branze, 43, 25123 Brescia, Italy

\* Correspondence: h.manyar@qub.ac.uk

HPLC analysis was performed using Agilent 1100 system equipped with Eclipse XDB-C18 reverse phase column (3.5µm, 4.6×150mm) and Diode Array Detector (DAD) at a wavelength of 254nm using 50% methanol and 50% water as the mobile phase. An example of the HPLC chromatogram is shown below.

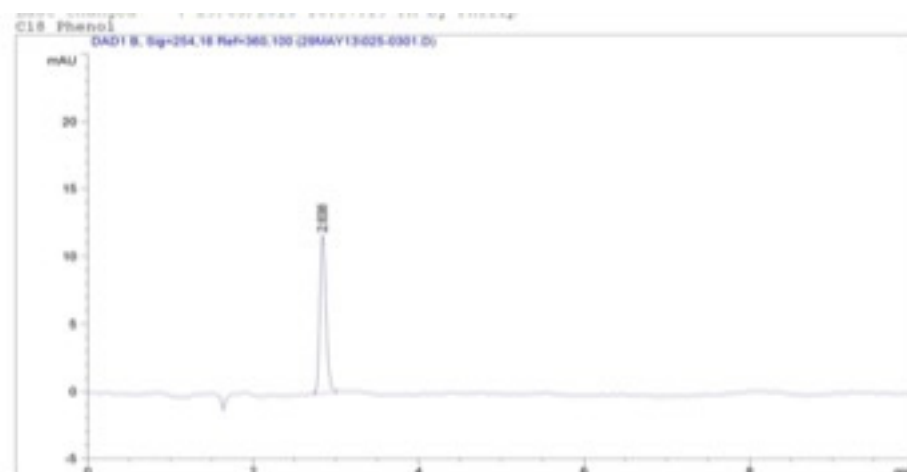

**Figure S1.** An example of HPLC chromatogram.
